# Supplementary material for: Secondary metabolite gene expression and interplay of bacterial functions in a tropical freshwater cyanobacterial bloom
Source: PubMed Central journal article supplement — ISME J. 2014 Mar 20;8(9):1866–78. doi: 10.1038/ismej.2014.27 (PMC4139720; doi:10.1038/ismej.2014.27), 2014-03-20

Supplementary Figure 5 Bar graph showing the distribution of transcripts from KEGG metabolism pathways

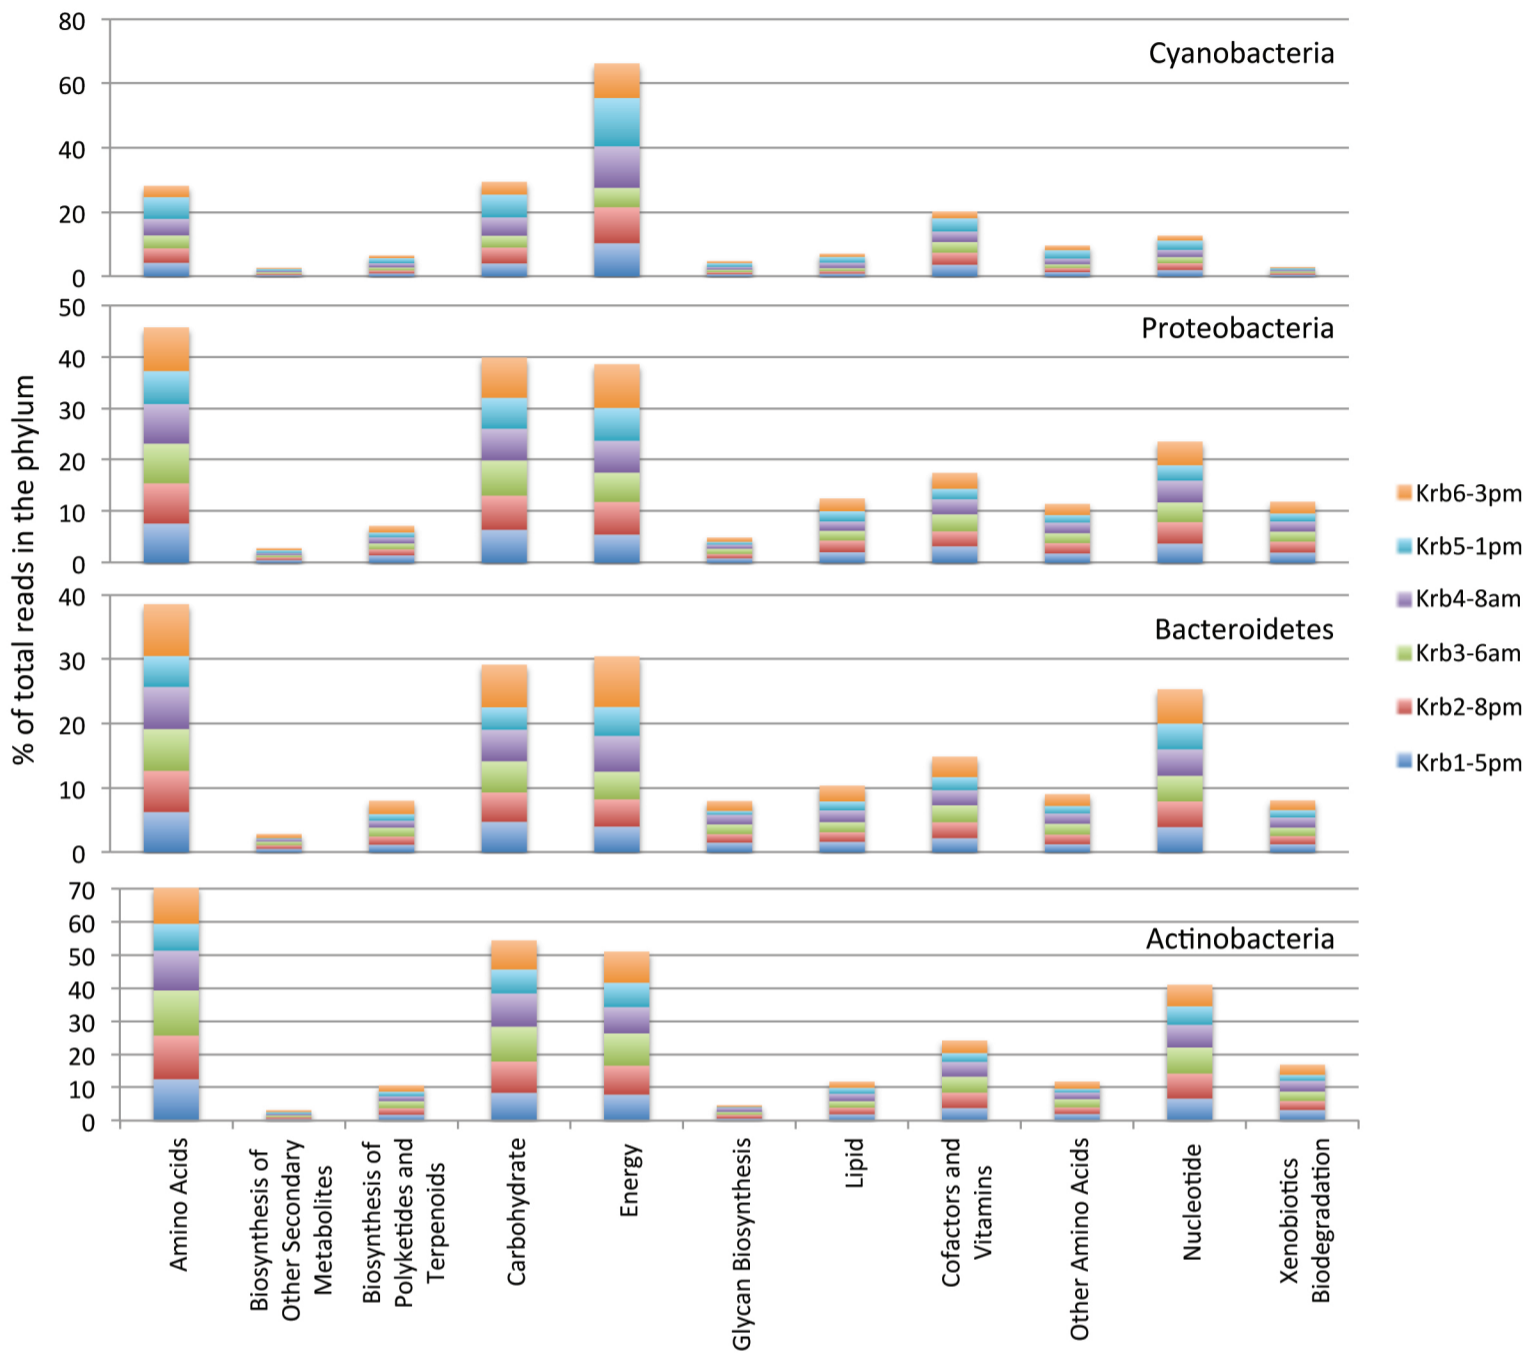

Supplement: ismej201427x5.pdf [file ismej201427x5.pdf]
