# Supplementary figures and images for: Secondary metabolite gene expression and interplay of bacterial functions in a tropical freshwater cyanobacterial bloom
Source: PubMed Central journal article supplement — ISME J. 2014 Mar 20;8(9):1866–78. doi: 10.1038/ismej.2014.27 (PMC4139720; doi:10.1038/ismej.2014.27), 2014-03-20

Supplementary Figure 1 Taxonomic breakdown of transcripts recovered from Kranji Reservoir

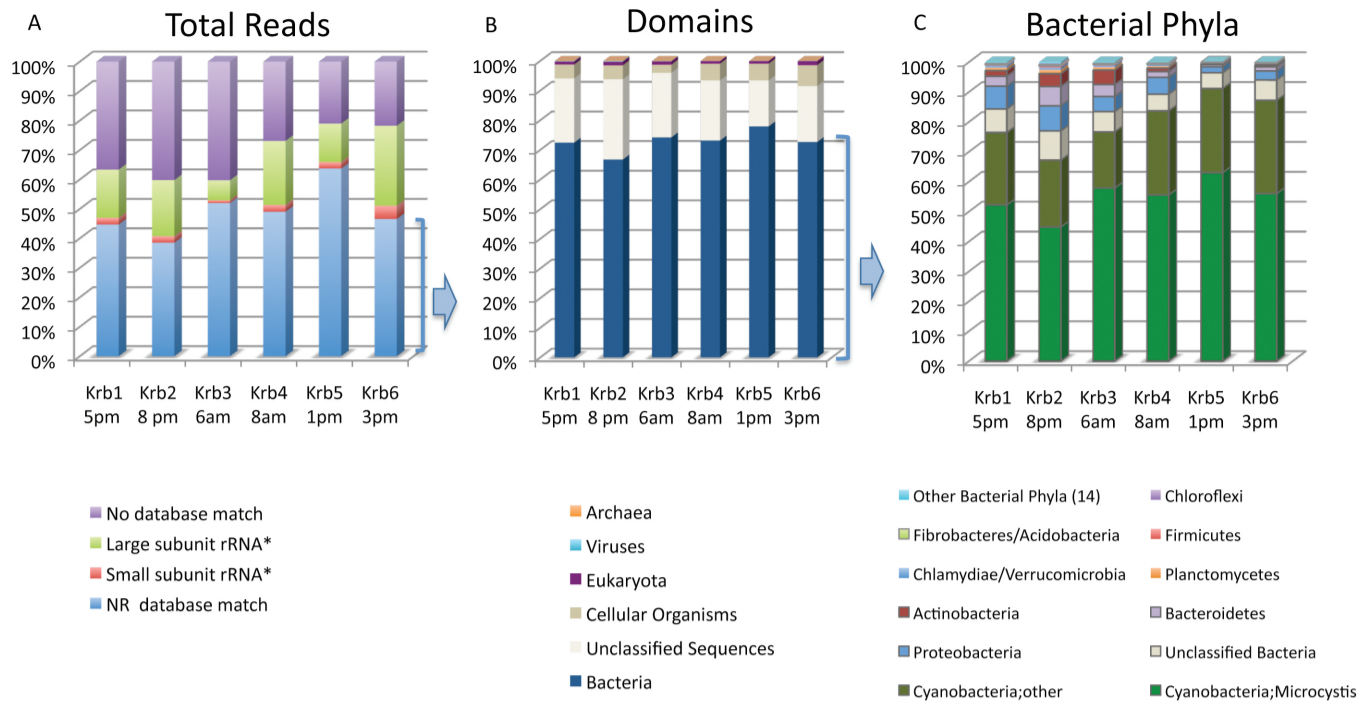

Supplement: ismej201427x1.pdf [file ismej201427x1.pdf]

Supplementary Figure 2 Metadata

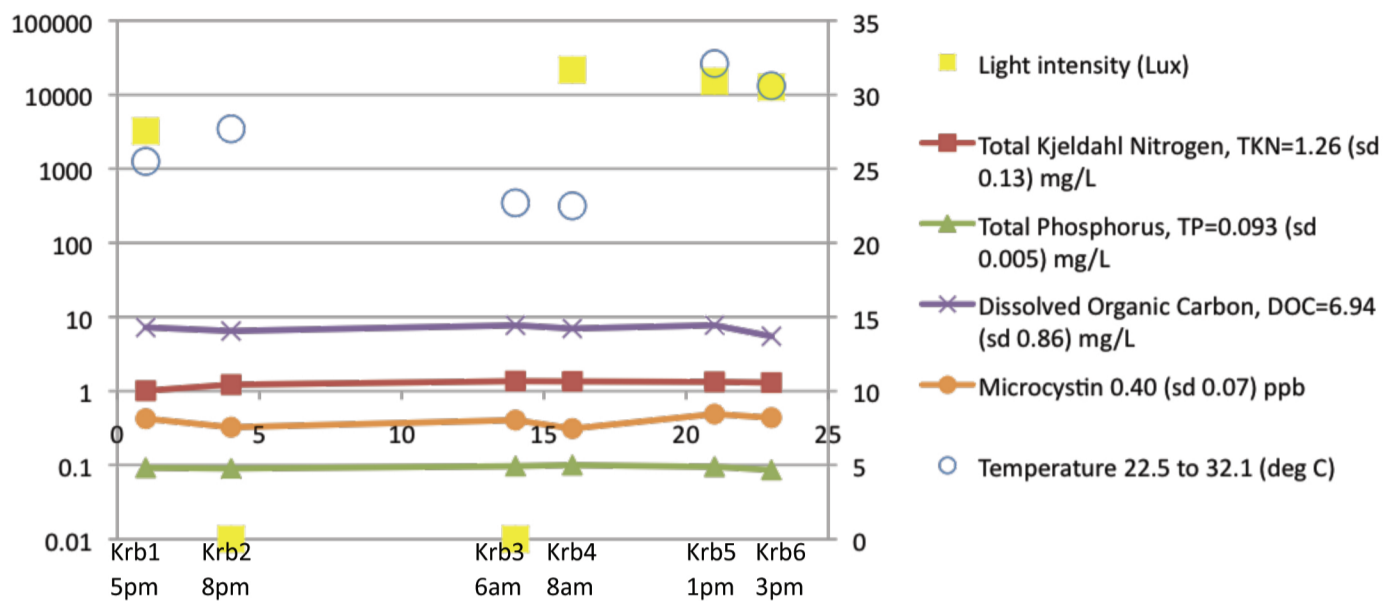

Supplement: ismej201427x2.pdf [file ismej201427x2.pdf]

Supplementary Figure 3 Transcripts more highly represented in the day

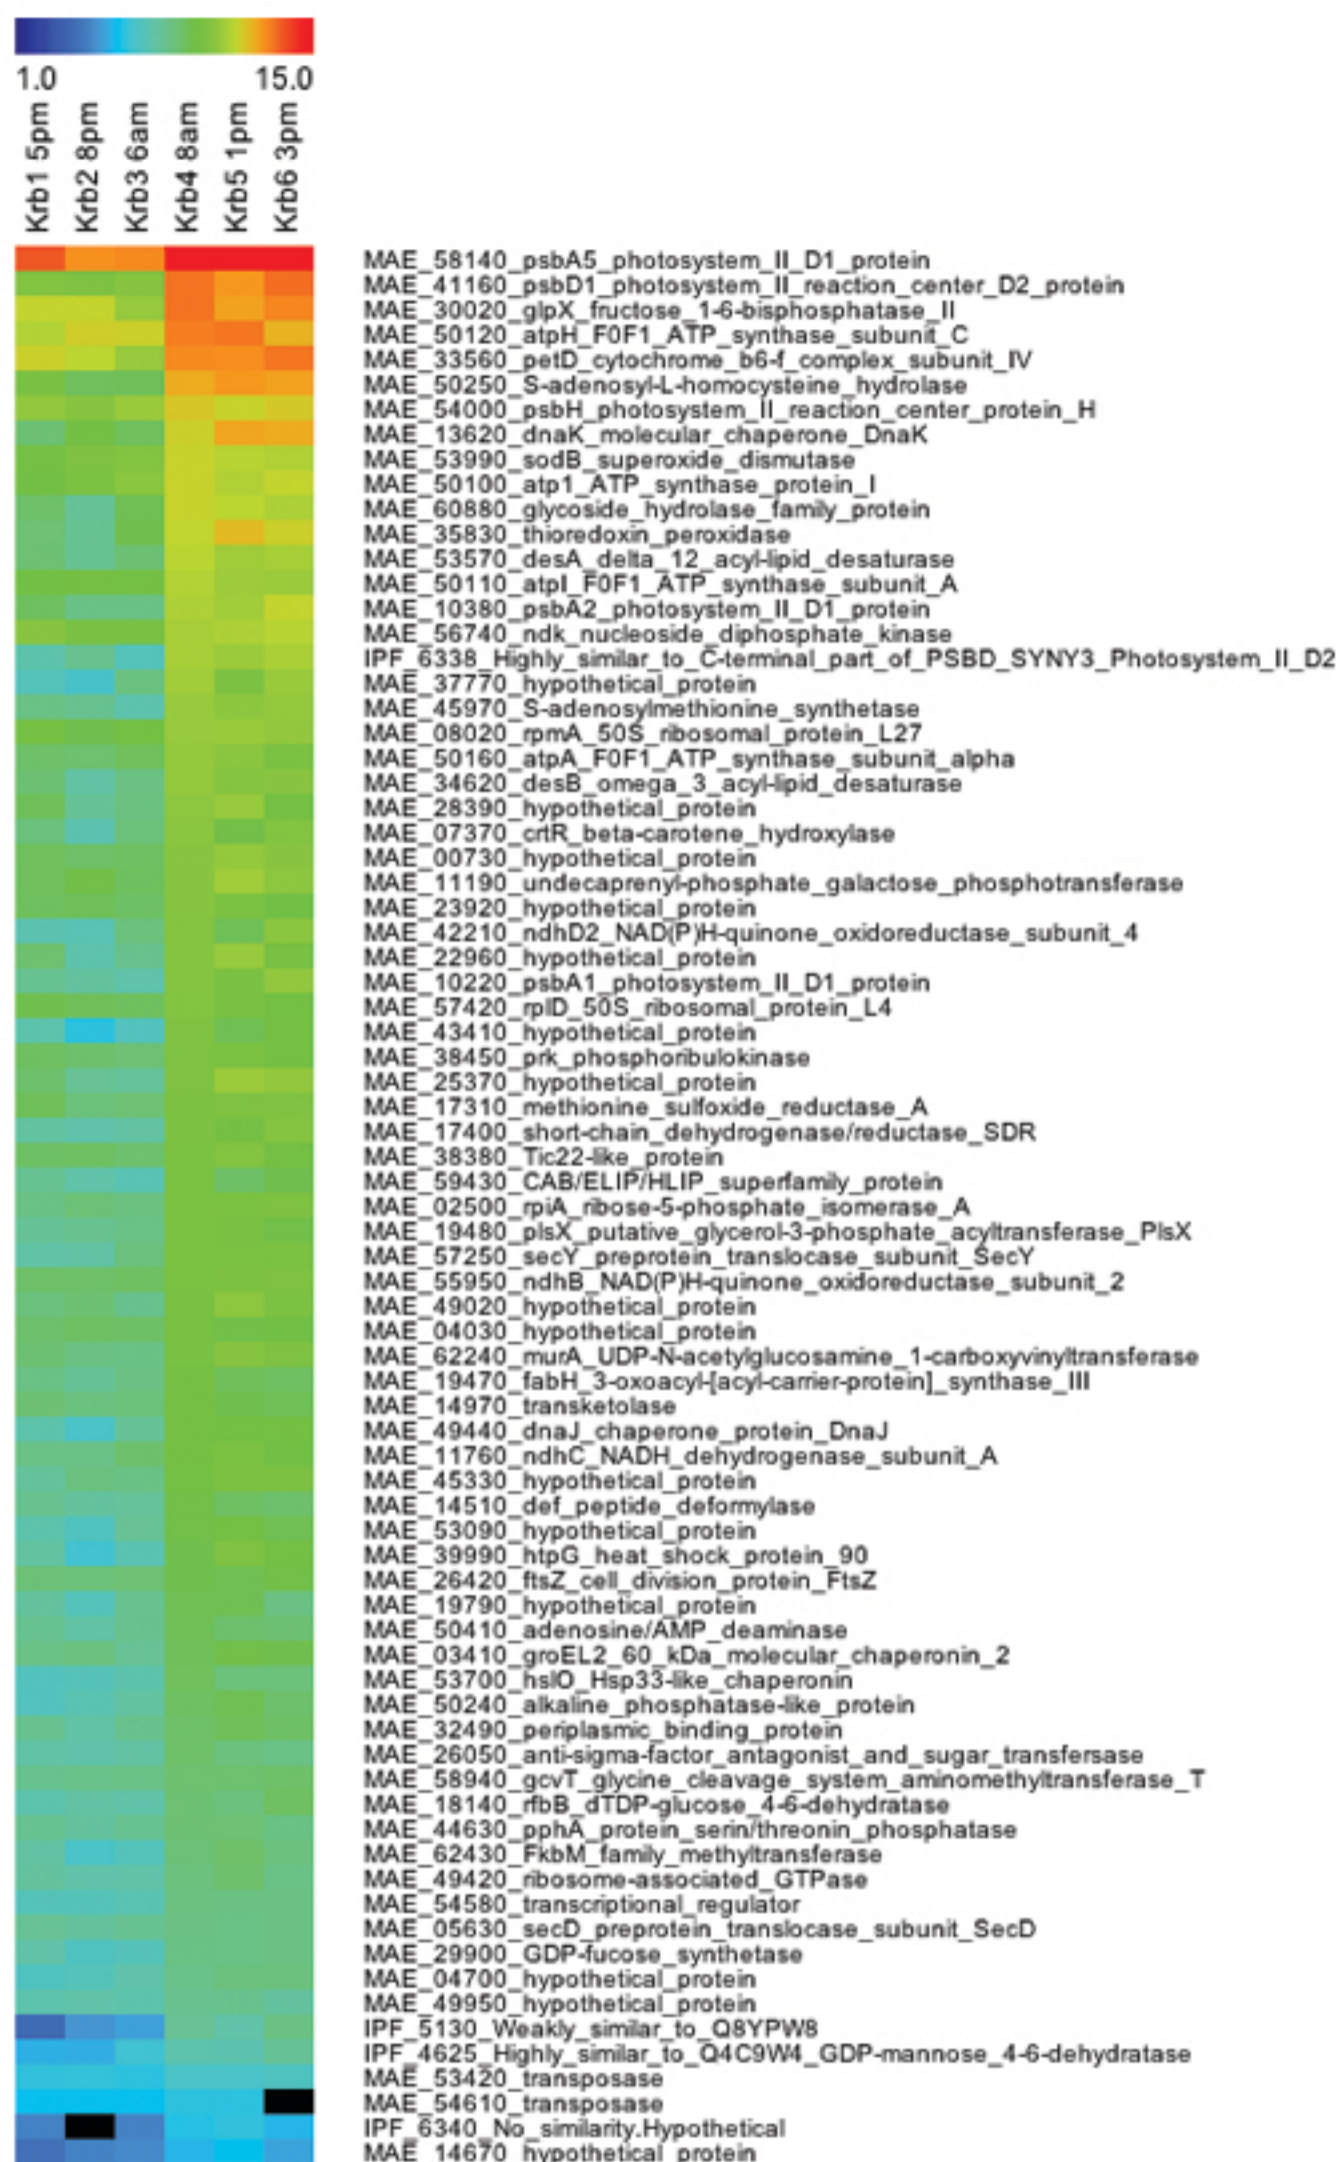

Supplement: ismej201427x3.pdf [file ismej201427x3.pdf]

Supplementary Figure 4 Transcripts more highly represented in the night

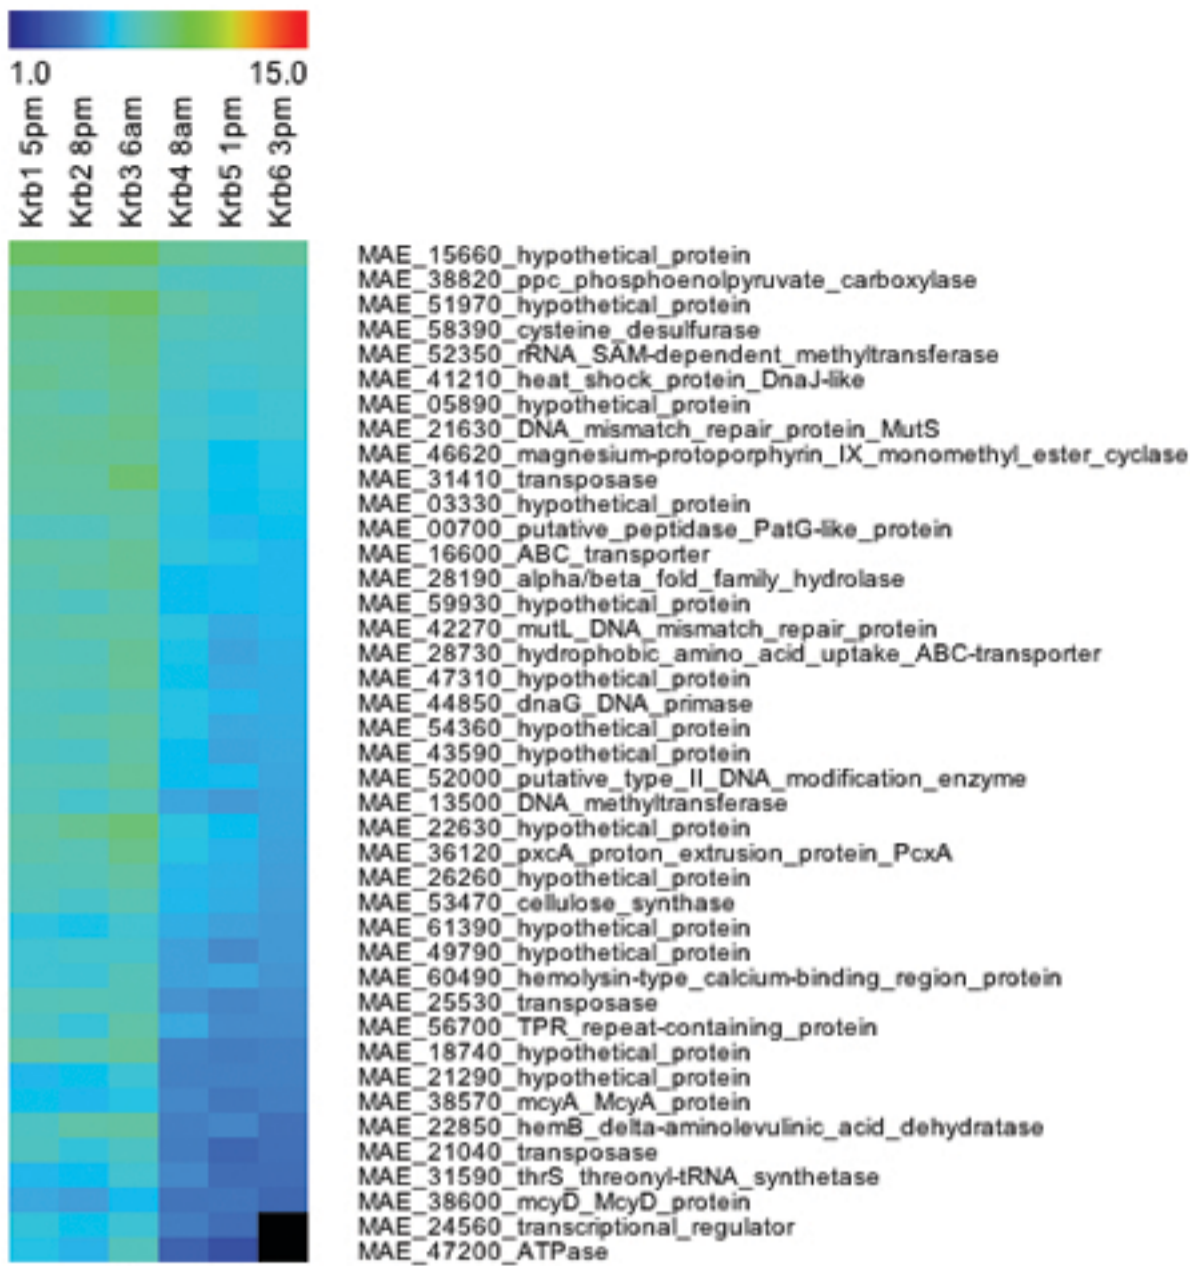

Supplement: ismej201427x4.pdf [file ismej201427x4.pdf]

Supplementary Figure 6 Secretion Systems

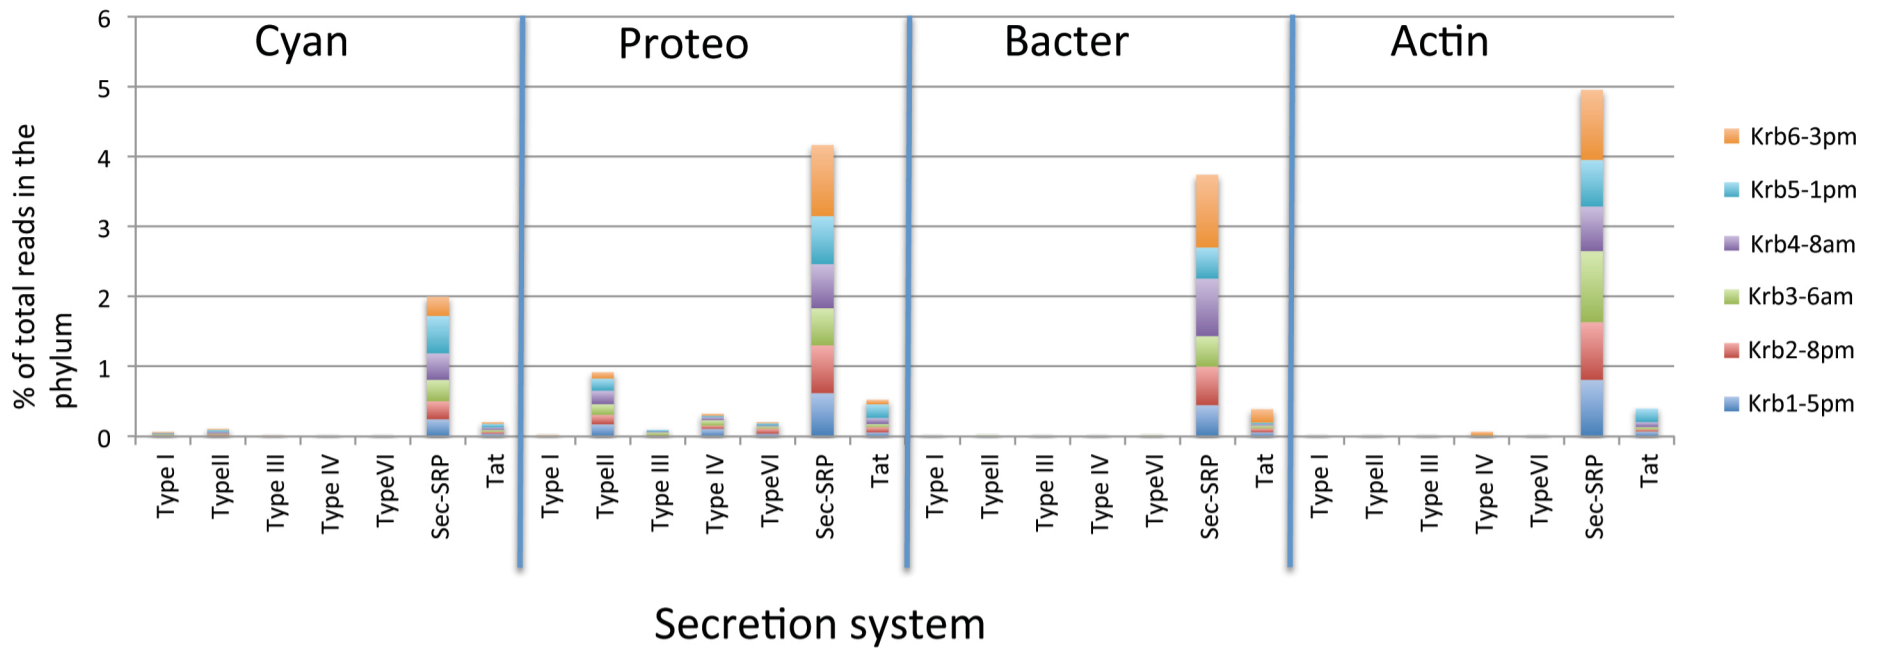

Supplement: ismej201427x6.pdf [file ismej201427x6.pdf]

Supplementary Figure 7 Cellular processes

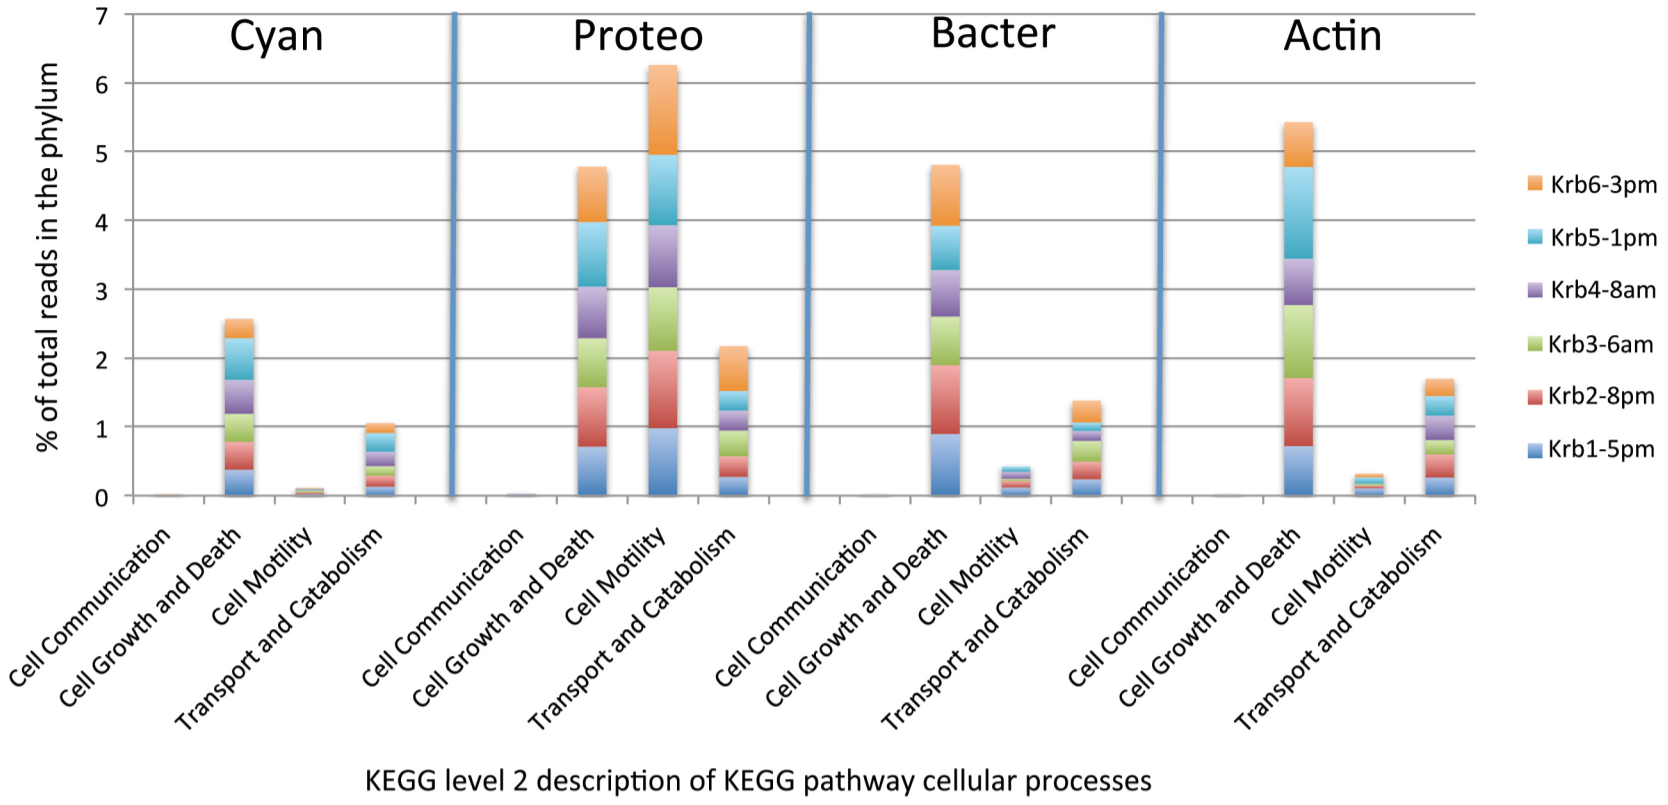

Supplement: ismej201427x7.pdf [file ismej201427x7.pdf]
